# Supplementary material for: Inflammation Modulates RLIP76/RALBP1 Electrophile-Glutathione Conjugate Transporter and Housekeeping Genes in Human Blood-Brain Barrier Endothelial Cells
Source: PubMed Central journal article supplement (PMC4583384; doi:10.1371/journal.pone.0139101), 2015-09-25
Supplement: pone.0139101.s001.pdf [file pone.0139101.s001.pdf]

| Sample/Template               | details                                                                                                                                                                                               |
|-------------------------------|-------------------------------------------------------------------------------------------------------------------------------------------------------------------------------------------------------|
| Source                        | Human endothelial ECV304 cells in a blood-brain barrier model                                                                                                                                         |
| Method of preservation        | No preservation; Total RNA was extracted directly from PBS washed cell layers                                                                                                                         |
| Storage time (if appropriate) | RNA was stored at -80°C and reverse transcribed into cDNA within one month. cDNA was stored at -80°C and analyzed within 6 months.                                                                    |
| Handling                      | ----                                                                                                                                                                                                  |
| Extraction method             | Column based extraction method (NucleoSpin RNA II Kit (Macherey-Nagel, D).                                                                                                                            |
| RNA: DNA-free                 | All primer pairs used are intron-spanning primers. The RNA extraction protocol included on-column DNA digestion. Using microfluidics (Bioanalyzer), the quality of each RNA preparation was verified. |
| Concentration                 | All RNA preparations were quantified using microfluidics (Bioanalyzer).                                                                                                                               |
| RNA: integrity                | Integrity of each RNA preparation was verified using microfluidics (Bioanalyzer).                                                                                                                     |
| Inhibition-free               | Not all samples were tested for the absence of inhibitors. However, a representative set of samples was used to control for the absence of inhibitors using dilution series of target genes.          |
| Assay optimisation/validation |                                                                                                                                                                                                       |
| Accession numbers             |                                                                                                                                                                                                       |
| <i>ACTB</i>                   | NM_001101                                                                                                                                                                                             |
| <i>B2M</i>                    | NM_004048                                                                                                                                                                                             |
| <i>GAPDH</i>                  | NM_002046                                                                                                                                                                                             |
| <i>HPRT1</i>                  | NM_000194                                                                                                                                                                                             |
| <i>ICAM1</i>                  | NM_000201                                                                                                                                                                                             |
| <i>MCP1</i>                   | NM_002982                                                                                                                                                                                             |
| <i>MRP1</i>                   | NM_004996                                                                                                                                                                                             |
| <i>PMM1</i>                   | NM_002676                                                                                                                                                                                             |
| <i>PSMB6</i>                  | NM_002798                                                                                                                                                                                             |
| <i>RLIP76</i>                 | NM_006788                                                                                                                                                                                             |
| <i>SDHA</i>                   | NM_004168                                                                                                                                                                                             |
| <i>TUBA1B</i>                 | NM_006082                                                                                                                                                                                             |
| <i>VCAM1</i>                  | NM_001078                                                                                                                                                                                             |
| <i>YWHAZ</i>                  | NM_003406                                                                                                                                                                                             |
|                               |                                                                                                                                                                                                       |
| Amplicon details              |                                                                                                                                                                                                       |
| <i>ACTB</i>                   | 140 bp                                                                                                                                                                                                |
| <i>B2M</i>                    | 86 bp                                                                                                                                                                                                 |
| <i>GAPDH</i>                  | 165 bp                                                                                                                                                                                                |
| <i>HPRT1</i>                  | 94 bp                                                                                                                                                                                                 |
| <i>ICAM1</i>                  | 111 bp                                                                                                                                                                                                |
| <i>MCP1</i>                   | 131 bp                                                                                                                                                                                                |
| <i>MRP1</i>                   | 97 bp                                                                                                                                                                                                 |
| <i>PMM1</i>                   | 122 bp                                                                                                                                                                                                |
| <i>PSMB6</i>                  | 82 bp                                                                                                                                                                                                 |
| <i>RLIP76</i>                 | 104 bp                                                                                                                                                                                                |
| <i>SDHA</i>                   | 86 bp                                                                                                                                                                                                 |
| <i>TUBA1B</i>                 | 181 bp                                                                                                                                                                                                |
| <i>VCAM1</i>                  | 87 bp                                                                                                                                                                                                 |
| <i>YWHAZ</i>                  | 94 bp                                                                                                                                                                                                 |

| Primer sequence        |                                                                                                                                                               |
|------------------------|---------------------------------------------------------------------------------------------------------------------------------------------------------------|
|                        | <b>forward</b>                                                                                                                                                |
| <b>ACTB</b>            | CTGGAACGGTGAAGGTGACA                                                                                                                                          |
| <b>B2M</b>             | TGCTGTCTCCATGTTTGATGATCT                                                                                                                                      |
| <b>GAPDH</b>           | GGAGTCCACTGGCGTCTTCAC                                                                                                                                         |
| <b>HPRT1</b>           | TGACACTGGCAAAACAATGCA                                                                                                                                         |
| <b>ICAM1</b>           | CCTATGGCAACGACTCCTTC                                                                                                                                          |
| <b>MCP1</b>            | AACACTGCCCTCCATCTAAAG                                                                                                                                         |
| <b>MRP1</b>            | GCTGATGGAGGCTGACAAG                                                                                                                                           |
| <b>PMM1</b>            | AAGCGTGGAACCTTCATCGA                                                                                                                                          |
| <b>PSMB6</b>           | ACCTGATGGCGGGAATCAT                                                                                                                                           |
| <b>RLIP76</b>          | AAGGCATCTACAGAGTATCAGG                                                                                                                                        |
| <b>SDHA</b>            | TGGGAACAAGAGGGCATCTG                                                                                                                                          |
| <b>TUBA1B</b>          | CTTTGAGCCAGCCAACCAGATG                                                                                                                                        |
| <b>VCAM1</b>           | CCTCCTTAATAATACCTGCCATTG                                                                                                                                      |
| <b>YWHAZ</b>           | ACTTTTGGTACATTGTGGCTTCAA                                                                                                                                      |
|                        | <b>reverse</b>                                                                                                                                                |
| <b>ACTB</b>            | AAGGGACTTCCTGTAACAATGCA                                                                                                                                       |
| <b>B2M</b>             | TCTCTGCTCCCCACCTCTAAGT                                                                                                                                        |
| <b>GAPDH</b>           | GAGGCATTGCTGATGATCTTGAGG                                                                                                                                      |
| <b>HPRT1</b>           | GGTCCTTTTACCAGCAAGCT                                                                                                                                          |
| <b>ICAM1</b>           | TCTCCTGGCTCTGGTTCC                                                                                                                                            |
| <b>MCP1</b>            | TCCACGACCTCCACTTCC                                                                                                                                            |
| <b>MRP1</b>            | GCTGAGGAAGGAGATGAAGAG                                                                                                                                         |
| <b>PMM1</b>            | TCCCGGATCTTCTCTTTCTTGTC                                                                                                                                       |
| <b>PSMB6</b>           | ATCATACCCCCATAGGCACT                                                                                                                                          |
| <b>RLIP76</b>          | AGTGTTAGGCTCATAGTCTTCC                                                                                                                                        |
| <b>SDHA</b>            | CCACCACTGCATCAAATTCATG                                                                                                                                        |
| <b>TUBA1B</b>          | GATGCCAACCTTGAAGCCAGTG                                                                                                                                        |
| <b>VCAM1</b>           | GTGCTTCTACAAGACTATATGACC                                                                                                                                      |
| <b>YWHAZ</b>           | CCGCCAGGACAAACCAGTAT                                                                                                                                          |
|                        |                                                                                                                                                               |
| <i>Probe sequence*</i> | no probes used                                                                                                                                                |
| <i>In silico</i>       | All primers were subjected to BLAST analysis                                                                                                                  |
| empirical              | Forward and reverse primers were used at the following concentrations (fwd/rev)                                                                               |
| <b>ACTB</b>            | 300/100                                                                                                                                                       |
| <b>B2M</b>             | 300/900                                                                                                                                                       |
| <b>GAPDH</b>           | 300/600                                                                                                                                                       |
| <b>HPRT1</b>           | 300/900                                                                                                                                                       |
| <b>ICAM1</b>           | 100/100                                                                                                                                                       |
| <b>MCP1</b>            | 100/100                                                                                                                                                       |
| <b>MRP1</b>            | 100/100                                                                                                                                                       |
| <b>PMM1</b>            | 100/100                                                                                                                                                       |
| <b>PSMB6</b>           | 100/100                                                                                                                                                       |
| <b>RLIP76</b>          | 100/100                                                                                                                                                       |
| <b>SDHA</b>            | 300/900                                                                                                                                                       |
| <b>TUBA1B</b>          | 100/100                                                                                                                                                       |
| <b>VCAM1</b>           | 100/100                                                                                                                                                       |
| <b>YWHAZ</b>           | 600/600                                                                                                                                                       |
|                        |                                                                                                                                                               |
| Priming conditions     | For cDNA synthesis, random RT primers were used as provided by the manufacturer (High Capacity cDNA Reverse Transcription Kit (Applied Biosystems, Austria)). |
| PCR efficiency         | qPCR efficiencies were determined using dilution series of cDNA prepared from endothelial ECV304 cell mRNA. Used efficiencies are given below in %.           |
| <b>ACTB</b>            | 97.0                                                                                                                                                          |
| <b>B2M</b>             | 100.5                                                                                                                                                         |
| <b>GAPDH</b>           | 97.5                                                                                                                                                          |
| <b>HPRT1</b>           | 96.5                                                                                                                                                          |
| <b>ICAM1</b>           | 94.0                                                                                                                                                          |
| <b>MCP1</b>            | 110.0                                                                                                                                                         |
| <b>MRP1</b>            | 94.5                                                                                                                                                          |

|                                      |                                                                                                                                                                                                                                                                                                                                                                                                                                                                                                   |
|--------------------------------------|---------------------------------------------------------------------------------------------------------------------------------------------------------------------------------------------------------------------------------------------------------------------------------------------------------------------------------------------------------------------------------------------------------------------------------------------------------------------------------------------------|
| <b>PMM1</b>                          | 109.0                                                                                                                                                                                                                                                                                                                                                                                                                                                                                             |
| <b>PSMB6</b>                         | 99.0                                                                                                                                                                                                                                                                                                                                                                                                                                                                                              |
| <b>RLIP76</b>                        | 101.5                                                                                                                                                                                                                                                                                                                                                                                                                                                                                             |
| <b>SDHA</b>                          | 100.0                                                                                                                                                                                                                                                                                                                                                                                                                                                                                             |
| <b>TUBA1B</b>                        | 97.5                                                                                                                                                                                                                                                                                                                                                                                                                                                                                              |
| <b>VCAM1</b>                         | 108.5                                                                                                                                                                                                                                                                                                                                                                                                                                                                                             |
| <b>YWHAZ</b>                         | 99.0                                                                                                                                                                                                                                                                                                                                                                                                                                                                                              |
| Linear dynamic range                 | The dynamic range of the primers was spanning unknown targets as determined by dilution curves.                                                                                                                                                                                                                                                                                                                                                                                                   |
| Limits of detection                  | LODs were not determined in this study.                                                                                                                                                                                                                                                                                                                                                                                                                                                           |
| Intra-assay variation                | The intra-assay variation was below one Cq.                                                                                                                                                                                                                                                                                                                                                                                                                                                       |
| <b>RT/PCR</b>                        |                                                                                                                                                                                                                                                                                                                                                                                                                                                                                                   |
| Protocols                            | <b>RT:</b> equal RNA quantities were reverse transcribed into cDNA using the High Capacity cDNA Reverse Transcription Kit (Applied Biosystems, Austria).<br><b>qPCR:</b> reactions were performed in 25 µl reaction mixtures containing 1 µl cDNA, 12.5 µl Brilliant SYBR Green QPCR Master Mix (Stratagene, La Jolla, CA, USA), primers as indicated (Metabion, Martinsried, D), and nuclease-free water to 25 µl, and run in duplicate on a Mx3000P QPCR system (Stratagene La Jolla, CA, USA). |
| Reagents                             | see above.                                                                                                                                                                                                                                                                                                                                                                                                                                                                                        |
| Duplicate RT                         | Replicates of the RT step were not performed in this study.                                                                                                                                                                                                                                                                                                                                                                                                                                       |
| NTC                                  | NTCs were included in each run. The absence of both amplification and melting curve peaks were mandatory for the acceptance of the run.                                                                                                                                                                                                                                                                                                                                                           |
| NAC                                  | Minus RT controls were not performed in this study.                                                                                                                                                                                                                                                                                                                                                                                                                                               |
| Positive control                     | Inter-run calibrators were not used.                                                                                                                                                                                                                                                                                                                                                                                                                                                              |
| <b>Data analysis</b>                 |                                                                                                                                                                                                                                                                                                                                                                                                                                                                                                   |
| Specialist software                  | Data were analyzed using the MxPro software v.4 (Stratagene) considering both amplification efficiencies and normalization to single reference genes or Normalization Factor.                                                                                                                                                                                                                                                                                                                     |
| Statistical justification            | All qPCR reactions were performed in duplicate. Statistical analyses were conducted using two-tailed unpaired t tests or one-way ANOVA with post-hoc Tukey tests cross-comparing all study groups, as appropriate. Data were considered significant at $p < 0.05$ .                                                                                                                                                                                                                               |
| Transparent, validated normalisation | The expression stability of 9 candidate reference genes was determined across the samples using geNorm, NormFinder, and BestKeeper VBA algorithms. Thus, PSMB6 and HPRT1 were selected as stable reference genes under the experimental conditions of this study and their average expression was used as a Normalization Factor.                                                                                                                                                                 |

**Table S1.**
