# Supplementary material for: Inflammation Modulates RLIP76/RALBP1 Electrophile-Glutathione Conjugate Transporter and Housekeeping Genes in Human Blood-Brain Barrier Endothelial Cells
Source: PubMed Central journal article supplement (PMC4583384; doi:10.1371/journal.pone.0139101), 2015-09-25
Supplement: pone.0139101.s003.pdf [file pone.0139101.s003.pdf]

| <b>Metagroup</b>                    | <b>UP/DOWN</b> | <b>t-statistic</b> | <b>p-value</b> |
|-------------------------------------|----------------|--------------------|----------------|
| solid tissue neoplasm cell line     | UP             | 28                 | 1.00E-10       |
| blood neoplasm cell line            | UP             | 20                 | 1.00E-10       |
| leukemia                            | UP             | 10                 | 1.00E-10       |
| non neoplastic cell line            | UP             | 5.3                | 2.66E-07       |
| non leukemic blood neoplasm         | UP             | 2.9                | 0.005          |
| normal blood                        | NONDE          | 0.67               | 0.538          |
| germ cell neoplasm                  | NONDE          | -1.4               | 0.174          |
| sarcoma                             | DOWN           | -3.5               | 6.44E-04       |
| non breast carcinoma                | DOWN           | -5.6               | 3.58E-08       |
| other neoplasm                      | DOWN           | -6.1               | 2.86E-09       |
| blood non neoplastic disease        | DOWN           | -6.7               | 1.00E-10       |
| breast cancer                       | DOWN           | -6.9               | 1.00E-10       |
| nervous system neoplasm             | DOWN           | -7.3               | 1.00E-10       |
| normal solid tissue                 | DOWN           | -10                | 1.00E-10       |
| solid tissue non neoplastic disease | DOWN           | -11                | 1.00E-10       |
