# Supplementary material for: Inflammation Modulates RLIP76/RALBP1 Electrophile-Glutathione Conjugate Transporter and Housekeeping Genes in Human Blood-Brain Barrier Endothelial Cells
Source: PubMed Central journal article supplement (PMC4583384; doi:10.1371/journal.pone.0139101), 2015-09-25
Supplement: pone.0139101.s004.pdf [file pone.0139101.s004.pdf]

| <b>Metagroup</b>                    | <b>UP/DOWN</b> | <b>t-statistic</b> | <b>p-value</b> |
|-------------------------------------|----------------|--------------------|----------------|
| solid tissue neoplasm cell line     | UP             | 23                 | 1.00E-10       |
| non neoplastic cell line            | UP             | 15                 | 1.00E-10       |
| blood neoplasm cell line            | UP             | 10                 | 1.00E-10       |
| solid tissue non neoplastic disease | UP             | 9.4                | 1.00E-10       |
| leukemia                            | UP             | 6.6                | 1.00E-10       |
| germ cell neoplasm                  | UP             | 4.3                | 2.54E-05       |
| nervous system neoplasm             | UP             | 3.5                | 7.59E-04       |
| normal solid tissue                 | NONDE          | -0.78              | 0.471          |
| other neoplasm                      | NONDE          | -1                 | 0.351          |
| sarcoma                             | NONDE          | -1.5               | 0.165          |
| non breast carcinoma                | DOWN           | -3.5               | 6.68E-04       |
| non leukemic blood neoplasm         | DOWN           | -6.8               | 1.00E-10       |
| breast cancer                       | DOWN           | -15                | 1.00E-10       |
| normal blood                        | DOWN           | -21                | 1.00E-10       |
| blood non neoplastic disease        | DOWN           | -34                | 1.00E-10       |
