# Supplementary material for: Inflammation Modulates RLIP76/RALBP1 Electrophile-Glutathione Conjugate Transporter and Housekeeping Genes in Human Blood-Brain Barrier Endothelial Cells
Source: PubMed Central journal article supplement (PMC4583384; doi:10.1371/journal.pone.0139101), 2015-09-25
Supplement: pone.0139101.s005.pdf [file pone.0139101.s005.pdf]

| <b>Metagroup</b>                    | <b>UP/DOWN</b> | <b>t-statistic</b> | <b>p-value</b> |
|-------------------------------------|----------------|--------------------|----------------|
| normal blood                        | UP             | 19                 | 1.00E-10       |
| blood non neoplastic disease        | UP             | 16                 | 1.00E-10       |
| leukemia                            | UP             | 14                 | 1.00E-10       |
| non breast carcinoma                | UP             | 11                 | 1.00E-10       |
| breast cancer                       | UP             | 7.8                | 1.00E-10       |
| non leukemic blood neoplasm         | UP             | 7                  | 1.00E-10       |
| other neoplasm                      | UP             | 5.9                | 9.56E-09       |
| nervous system neoplasm             | NONDE          | 1.8                | 0.09           |
| sarcoma                             | NONDE          | 0.6                | 0.584          |
| germ cell neoplasm                  | NONDE          | -1.2               | 0.242          |
| normal solid tissue                 | DOWN           | -3.3               | 0.002          |
| blood neoplasm cell line            | DOWN           | -8.2               | 1.00E-10       |
| solid tissue non neoplastic disease | DOWN           | -10                | 1.00E-10       |
| non neoplastic cell line            | DOWN           | -15                | 1.00E-10       |
| solid tissue neoplasm cell line     | DOWN           | -53                | 1.00E-10       |
