# Supplementary material for: Inflammation Modulates RLIP76/RALBP1 Electrophile-Glutathione Conjugate Transporter and Housekeeping Genes in Human Blood-Brain Barrier Endothelial Cells
Source: PubMed Central journal article supplement (PMC4583384; doi:10.1371/journal.pone.0139101), 2015-09-25
Supplement: pone.0139101.s006.pdf [file pone.0139101.s006.pdf]

| Metagroup                                        | Up/Down | t-statistic | p-value               |
|--------------------------------------------------|---------|-------------|-----------------------|
| acute myeloid leukemia                           | UP      | 22          | $<1 \times 10^{-10}$  |
| bronchoalveolar lavage cell                      | UP      | 20          | $<1 \times 10^{-10}$  |
| MCF7 breast epithelial adenocarcinoma            | UP      | 20          | $<1 \times 10^{-10}$  |
| ht-29 colorectal adenocarcinoma                  | UP      | 15          | $<1 \times 10^{-10}$  |
| monocyte                                         | UP      | 13          | $<1 \times 10^{-10}$  |
| macrophage                                       | UP      | 12          | $<1 \times 10^{-10}$  |
| leukocyte                                        | UP      | 11          | $<1 \times 10^{-10}$  |
| chronic myeloid leukemia                         | UP      | 9.7         | $<1 \times 10^{-10}$  |
| ovarian tumor                                    | UP      | 9.5         | $<1 \times 10^{-10}$  |
| Hep-2 larynx squamous cell carcinoma             | UP      | 9.4         | $<1 \times 10^{-10}$  |
| hepatocellular carcinoma                         | UP      | 9           | $<1 \times 10^{-10}$  |
| A549 lung adenocarcinoma                         | UP      | 8.8         | $<1 \times 10^{-10}$  |
| breast cancer                                    | UP      | 7.7         | $<1 \times 10^{-10}$  |
| MDA-MB-231 breast cancer                         | UP      | 7.3         | $<1 \times 10^{-10}$  |
| mononuclear cell infection                       | UP      | 7.1         | $<1 \times 10^{-10}$  |
| mcf-7aro breast epithelial adenocarcinoma        | UP      | 6.3         | $1.42 \times 10^{-9}$ |
| HeLa cervical adenocarcinoma                     | UP      | 6.2         | $1.61 \times 10^{-9}$ |
| bladder cancer                                   | UP      | 6.1         | $3.4 \times 10^{-9}$  |
| embryonal rhabdomyosarcoma                       | UP      | 5.9         | $1.02 \times 10^{-8}$ |
| MDA468 breast cancer                             | UP      | 5.4         | $2.41 \times 10^{-7}$ |
| ssMCF7 breast cancer                             | UP      | 5.2         | $5.3 \times 10^{-7}$  |
| B-cell lymphoma                                  | UP      | 5.1         | $9.79 \times 10^{-7}$ |
| embryonic skin fibroblast                        | UP      | 5           | $1.36 \times 10^{-6}$ |
| primary intervertebral disc                      | UP      | 4.8         | $3.81 \times 10^{-6}$ |
| mononuclear cell                                 | UP      | 4.5         | $1.33 \times 10^{-5}$ |
| RKO colon carcinoma                              | UP      | 4.3         | $3.33 \times 10^{-5}$ |
| placenta basal plate                             | UP      | 4.2         | $5.23 \times 10^{-5}$ |
| INCaP prostate cancer                            | UP      | 4           | $1.24 \times 10^{-4}$ |
| ewings sarcoma                                   | UP      | 4           | $1.38 \times 10^{-4}$ |
| BT474 breast cancer                              | UP      | 3.9         | $1.73 \times 10^{-4}$ |
| fetal lung fibroblast                            | UP      | 3.9         | $2.32 \times 10^{-4}$ |
| universal reference                              | UP      | 3.6         | $5.22 \times 10^{-4}$ |
| thyroid adenocarcinoma                           | UP      | 3.3         | 0.002                 |
| myelogenous leukemia                             | UP      | 3.3         | 0.002                 |
| k562 myelogenous leukaemia                       | UP      | 3.1         | 0.004                 |
| unknown lung adenocarcinoma                      | UP      | 2.9         | 0.006                 |
| uterine tumor                                    | UP      | 2.9         | 0.007                 |
| IB3-1 adenovirus transformed bronchial epithelia | NONDE   | 2           | 0.066                 |
| myometrium                                       | NONDE   | 1.8         | 0.088                 |
| brain tumor                                      | NONDE   | 1.7         | 0.108                 |

| Metagroup                                 | Up/Down | t-statistic | p-value                |
|-------------------------------------------|---------|-------------|------------------------|
| HeLa cervical adenocarcinoma transfected  | NONDE   | 1.7         | 0.109                  |
| B cell                                    | NONDE   | 1.7         | 0.121                  |
| acute promyelocytic leukemia              | NONDE   | 1.6         | 0.137                  |
| T47D breast ductal carcinoma              | NONDE   | 1.4         | 0.209                  |
| thymocyte                                 | NONDE   | 1.3         | 0.233                  |
| mesenchymal stem cell                     | NONDE   | 1.1         | 0.311                  |
| hl60 promyelocytic leukemia               | NONDE   | 0.9         | 0.426                  |
| ts anaplastic large cell lymphoma         | NONDE   | 0.9         | 0.426                  |
| umbilical vein endothelial cell           | NONDE   | 0.87        | 0.439                  |
| pc3 prostate cancer                       | NONDE   | 0.66        | 0.566                  |
| neuroblastoma                             | NONDE   | 0.5         | 0.668                  |
| lung cancer                               | NONDE   | 0.43        | 0.715                  |
| prostate cancer                           | NONDE   | 0.28        | 0.813                  |
| smooth muscle                             | NONDE   | 0.28        | 0.814                  |
| embryonic lung fibroblast                 | NONDE   | 0.2         | 0.864                  |
| renal cell carcinoma                      | NONDE   | 0.17        | 0.888                  |
| Kaposi sarcoma                            | NONDE   | -0.67       | 0.555                  |
| preadipocytes                             | NONDE   | -0.96       | 0.394                  |
| Calu-3 lung adenocarcinoma                | NONDE   | -1          | 0.365                  |
| oral squamous cell carcinoma              | NONDE   | -1.2        | 0.278                  |
| FM9514 human embryonic myoblast           | NONDE   | -1.3        | 0.246                  |
| precursor T lymphoblastic leukemia        | NONDE   | -1.7        | 0.124                  |
| blood                                     | NONDE   | -2          | 0.061                  |
| germ cell tumor                           | DOWN    | -2.2        | 0.041                  |
| tonsil                                    | DOWN    | -2.4        | 0.023                  |
| skmel5 melanoma                           | DOWN    | -2.6        | 0.017                  |
| prostate gland                            | DOWN    | -2.7        | 0.01                   |
| kidney                                    | DOWN    | -2.7        | 0.013                  |
| colorectal cancer                         | DOWN    | -3.6        | $6.85 \times 10^{-4}$  |
| unknown lung small cell cancer            | DOWN    | -3.8        | $2.7 \times 10^{-4}$   |
| lymph node                                | DOWN    | -4.1        | $9.35 \times 10^{-5}$  |
| epidermis dermatitis                      | DOWN    | -4.2        | $5.57 \times 10^{-5}$  |
| MOLT4 T cell acute lymphoblastic leukemia | DOWN    | -4.3        | $4.45 \times 10^{-5}$  |
| T cell diseased                           | DOWN    | -5.5        | $1.03 \times 10^{-7}$  |
| lymphocyte                                | DOWN    | -5.5        | $1.53 \times 10^{-7}$  |
| HEK293 embryonic kidney                   | DOWN    | -5.7        | $5.06 \times 10^{-8}$  |
| hematopoietic stem cell                   | DOWN    | -6.1        | $3.06 \times 10^{-9}$  |
| T cell                                    | DOWN    | -6.2        | $2.1 \times 10^{-9}$   |
| caco2 colon adenocarcinoma                | DOWN    | -6.5        | $3.99 \times 10^{-10}$ |
| hypothalamus                              | DOWN    | -6.7        | $1.02 \times 10^{-10}$ |
| CD138+ plasma cell myeloma                | DOWN    | -8          | $<1 \times 10^{-10}$   |
| heart                                     | DOWN    | -8.2        | $<1 \times 10^{-10}$   |

| Metagroup                          | Up/Down | t-statistic | p-value              |
|------------------------------------|---------|-------------|----------------------|
| heart disease                      | DOWN    | -8.3        | $<1 \times 10^{-10}$ |
| skeletal muscle muscular dystrophy | DOWN    | -10         | $<1 \times 10^{-10}$ |
| skeletal muscle                    | DOWN    | -11         | $<1 \times 10^{-10}$ |
| brain                              | DOWN    | -12         | $<1 \times 10^{-10}$ |
| caudate nucleus Huntingtons        | DOWN    | -12         | $<1 \times 10^{-10}$ |
| caudate nucleus                    | DOWN    | -12         | $<1 \times 10^{-10}$ |
| brain bipolar disorder             | DOWN    | -12         | $<1 \times 10^{-10}$ |
| skeletal muscle diseased           | DOWN    | -12         | $<1 \times 10^{-10}$ |
| bronchial epithelia                | DOWN    | -13         | $<1 \times 10^{-10}$ |
| acute lymphoblastic leukemia       | DOWN    | -15         | $<1 \times 10^{-10}$ |
| frontal cortex Huntingtons         | DOWN    | -16         | $<1 \times 10^{-10}$ |
| frontal cortex                     | DOWN    | -16         | $<1 \times 10^{-10}$ |
| cerebellum                         | DOWN    | -19         | $<1 \times 10^{-10}$ |
| cerebellum Huntingtons             | DOWN    | -23         | $<1 \times 10^{-10}$ |
