# Supplementary material for: Inflammation Modulates RLIP76/RALBP1 Electrophile-Glutathione Conjugate Transporter and Housekeeping Genes in Human Blood-Brain Barrier Endothelial Cells
Source: PubMed Central journal article supplement (PMC4583384; doi:10.1371/journal.pone.0139101), 2015-09-25
Supplement: pone.0139101.s007.pdf [file pone.0139101.s007.pdf]

| Metagroup                                        | Up/Down | t-statistic | p-value                |
|--------------------------------------------------|---------|-------------|------------------------|
| MCF7 breast epithelial adenocarcinoma            | UP      | 27          | $<1 \times 10^{-10}$   |
| A549 lung adenocarcinoma                         | UP      | 17          | $<1 \times 10^{-10}$   |
| MDA-MB-231 breast cancer                         | UP      | 15          | $<1 \times 10^{-10}$   |
| HeLa cervical adenocarcinoma                     | UP      | 13          | $<1 \times 10^{-10}$   |
| lymphocyte                                       | UP      | 12          | $<1 \times 10^{-10}$   |
| RKO colon carcinoma                              | UP      | 10          | $<1 \times 10^{-10}$   |
| ts anaplastic large cell lymphoma                | UP      | 9.9         | $<1 \times 10^{-10}$   |
| Hep-2 larynx squamous cell carcinoma             | UP      | 9.9         | $<1 \times 10^{-10}$   |
| skeletal muscle diseased                         | UP      | 9.4         | $<1 \times 10^{-10}$   |
| Calu-3 lung adenocarcinoma                       | UP      | 9           | $<1 \times 10^{-10}$   |
| macrophage                                       | UP      | 7.8         | $<1 \times 10^{-10}$   |
| unknown lung adenocarcinoma                      | UP      | 7.5         | $<1 \times 10^{-10}$   |
| embryonic lung fibroblast                        | UP      | 7.4         | $<1 \times 10^{-10}$   |
| mcf-7aro breast epithelial adenocarcinoma        | UP      | 6.5         | $3.75 \times 10^{-10}$ |
| ssMCF7 breast cancer                             | UP      | 6.4         | $7.57 \times 10^{-10}$ |
| embryonic skin fibroblast                        | UP      | 6.1         | $4.02 \times 10^{-9}$  |
| fetal lung fibroblast                            | UP      | 6.1         | $4.81 \times 10^{-9}$  |
| FM9514 human embryonic myoblast                  | UP      | 5.8         | $2.58 \times 10^{-8}$  |
| pc3 prostate cancer                              | UP      | 5.6         | $5.46 \times 10^{-8}$  |
| IB3-1 adenovirus transformed bronchial epithelia | UP      | 5.6         | $6.5 \times 10^{-8}$   |
| HeLa cervical adenocarcinoma transfected         | UP      | 5.4         | $2.08 \times 10^{-7}$  |
| T47D breast ductal carcinoma                     | UP      | 5.3         | $4.1 \times 10^{-7}$   |
| ht-29 colorectal adenocarcinoma                  | UP      | 4.8         | $4.38 \times 10^{-6}$  |
| skmel5 melanoma                                  | UP      | 4.5         | $1.76 \times 10^{-5}$  |
| HEK293 embryonic kidney                          | UP      | 4.3         | $3.24 \times 10^{-5}$  |
| B cell                                           | UP      | 4.3         | $3.38 \times 10^{-5}$  |
| caco2 colon adenocarcinoma                       | UP      | 4.2         | $7.02 \times 10^{-5}$  |
| skeletal muscle                                  | UP      | 4.1         | $8.49 \times 10^{-5}$  |
| MOLT4 T cell acute lymphoblastic leukemia        | UP      | 4           | $1.17 \times 10^{-4}$  |
| mesenchymal stem cell                            | UP      | 4           | $1.32 \times 10^{-4}$  |
| umbilical vein endothelial cell                  | UP      | 3.9         | $1.96 \times 10^{-4}$  |
| universal reference                              | UP      | 3.9         | $2.08 \times 10^{-4}$  |
| BT474 breast cancer                              | UP      | 3.5         | $7.58 \times 10^{-4}$  |
| Kaposi sarcoma                                   | UP      | 3.4         | 0.001                  |
| MDA468 breast cancer                             | UP      | 3.2         | 0.002                  |
| unknown lung small cell cancer                   | UP      | 3.2         | 0.002                  |
| thymocyte                                        | UP      | 3           | 0.004                  |
| INCaP prostate cancer                            | UP      | 3           | 0.005                  |
| skeletal muscle muscular dystrophy               | UP      | 2.7         | 0.013                  |
| smooth muscle                                    | UP      | 2.6         | 0.014                  |

| Metagroup                          | Up/Down | t-statistic | p-value               |
|------------------------------------|---------|-------------|-----------------------|
| hematopoietic stem cell            | UP      | 2.2         | 0.039                 |
| germ cell tumor                    | UP      | 2.1         | 0.049                 |
| preadipocytes                      | NONDE   | 1.8         | 0.096                 |
| k562 myelogenous leukaemia         | NONDE   | 0.8         | 0.478                 |
| precursor T lymphoblastic leukemia | NONDE   | 0.73        | 0.521                 |
| monocyte                           | NONDE   | 0.47        | 0.686                 |
| epidermis dermatitis               | NONDE   | 0.25        | 0.832                 |
| ewings sarcoma                     | NONDE   | 0.24        | 0.84                  |
| neuroblastoma                      | NONDE   | -0.036      | 0.976                 |
| heart disease                      | NONDE   | -0.38       | 0.745                 |
| placenta basal plate               | NONDE   | -0.73       | 0.519                 |
| tonsil                             | NONDE   | -0.81       | 0.475                 |
| acute promyelocytic leukemia       | NONDE   | -1.4        | 0.219                 |
| embryonal rhabdomyosarcoma         | NONDE   | -1.7        | 0.109                 |
| oral squamous cell carcinoma       | DOWN    | -2.1        | 0.047                 |
| thyroid adenocarcinoma             | NONDE   | -2.1        | 0.052                 |
| B-cell lymphoma                    | NONDE   | -2.1        | 0.056                 |
| uterine tumor                      | DOWN    | -2.2        | 0.037                 |
| heart                              | DOWN    | -2.2        | 0.038                 |
| myometrium                         | DOWN    | -2.2        | 0.041                 |
| primary intervertebral disc        | DOWN    | -2.5        | 0.019                 |
| brain                              | DOWN    | -2.9        | 0.006                 |
| hepatocellular carcinoma           | DOWN    | -3.1        | 0.004                 |
| bronchoalveolar lavage cell        | DOWN    | -3.2        | 0.003                 |
| myelogenous leukemia               | DOWN    | -3.2        | 0.003                 |
| renal cell carcinoma               | DOWN    | -3.3        | 0.002                 |
| brain tumor                        | DOWN    | -3.5        | 0.001                 |
| bladder cancer                     | DOWN    | -4.2        | $5.65 \times 10^{-5}$ |
| prostate gland                     | DOWN    | -4.3        | $4.4 \times 10^{-5}$  |
| lymph node                         | DOWN    | -5.1        | $1.19 \times 10^{-6}$ |
| lung cancer                        | DOWN    | -5.2        | $4.85 \times 10^{-7}$ |
| prostate cancer                    | DOWN    | -5.7        | $3.66 \times 10^{-8}$ |
| CD138+ plasma cell myeloma         | DOWN    | -6          | $8.65 \times 10^{-9}$ |
| brain bipolar disorder             | DOWN    | -6.1        | $4.6 \times 10^{-9}$  |
| acute lymphoblastic leukemia       | DOWN    | -6.9        | $<1 \times 10^{-10}$  |
| kidney                             | DOWN    | -7.7        | $<1 \times 10^{-10}$  |
| caudate nucleus                    | DOWN    | -8.3        | $<1 \times 10^{-10}$  |
| frontal cortex                     | DOWN    | -8.7        | $<1 \times 10^{-10}$  |
| T cell diseased                    | DOWN    | -9          | $<1 \times 10^{-10}$  |
| frontal cortex Huntingtons         | DOWN    | -10         | $<1 \times 10^{-10}$  |
| bronchial epithelia                | DOWN    | -10         | $<1 \times 10^{-10}$  |
| hypothalamus                       | DOWN    | -10         | $<1 \times 10^{-10}$  |

| Metagroup                   | Up/Down | t-statistic | p-value              |
|-----------------------------|---------|-------------|----------------------|
| T cell                      | DOWN    | -11         | $<1 \times 10^{-10}$ |
| ovarian tumor               | DOWN    | -12         | $<1 \times 10^{-10}$ |
| cerebellum                  | DOWN    | -12         | $<1 \times 10^{-10}$ |
| hl60 promyelocytic leukemia | DOWN    | -12         | $<1 \times 10^{-10}$ |
| colorectal cancer           | DOWN    | -14         | $<1 \times 10^{-10}$ |
| caudate nucleus Huntingtons | DOWN    | -14         | $<1 \times 10^{-10}$ |
| mononuclear cell            | DOWN    | -17         | $<1 \times 10^{-10}$ |
| cerebellum Huntingtons      | DOWN    | -17         | $<1 \times 10^{-10}$ |
| leukocyte                   | DOWN    | -19         | $<1 \times 10^{-10}$ |
| mononuclear cell infection  | DOWN    | -20         | $<1 \times 10^{-10}$ |
| chronic myeloid leukemia    | DOWN    | -21         | $<1 \times 10^{-10}$ |
| blood                       | DOWN    | -21         | $<1 \times 10^{-10}$ |
| breast cancer               | DOWN    | -24         | $<1 \times 10^{-10}$ |
| acute myeloid leukemia      | DOWN    | -38         | $<1 \times 10^{-10}$ |
